# Supplementary material for: PI3Kδ activates E2F1 synthesis in response to mRNA translation stress
Source: PubMed Central journal article supplement (PMC5727396; doi:10.1038/s41467-017-02282-w), 2017-12-13
Supplement: 41467_2017_2282_MOESM1_ESM.pdf [file 41467_2017_2282_MOESM1_ESM.pdf]

**Supplementary Figure 1**

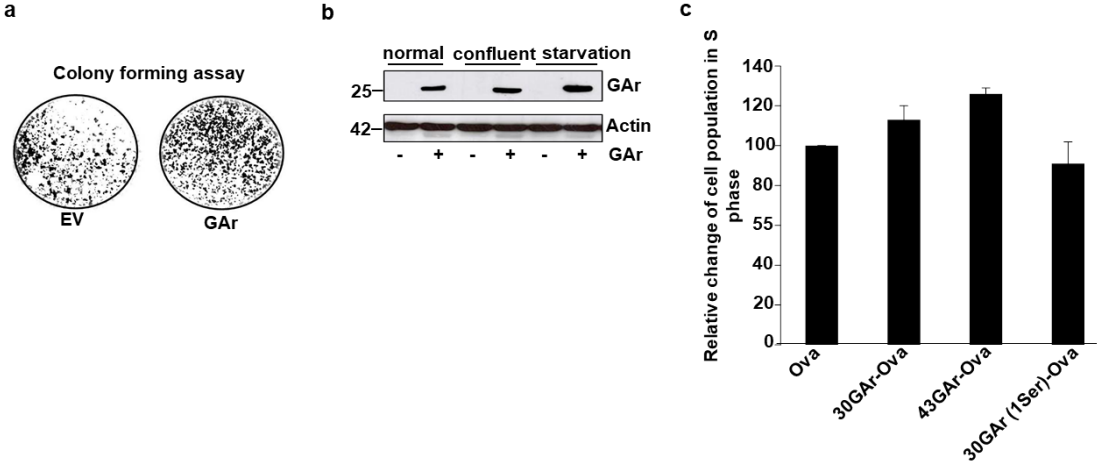

**Supplementary Figure 1.** a) Colonies of H1299 cells expressing the gly-ala repeat (GAR) of the Epstein Barr virus-encoded EBNA1, or plasmid empty vector (EV) after 15 days in selection medium. b) The western blot shows GAR expression levels under indicated growth conditions. c) Flow cytometry analysis of H1299 cells expressing various GAR-sequences fused to 5' of the Ovalbumin (Ova) open reading frame. The length of the GAR determines its translation inhibitory capacity and the longer the more efficient. The 30GAR (1Ser) has a serine residue inserted in a 30 amino acid long GAR sequence that disrupts the effect of the GAR on mRNA translation suppression <sup>1</sup>. The values represent the mean data from three independent experiments with s.d. Data relates to Figure 1.

Supplementary Figure 2

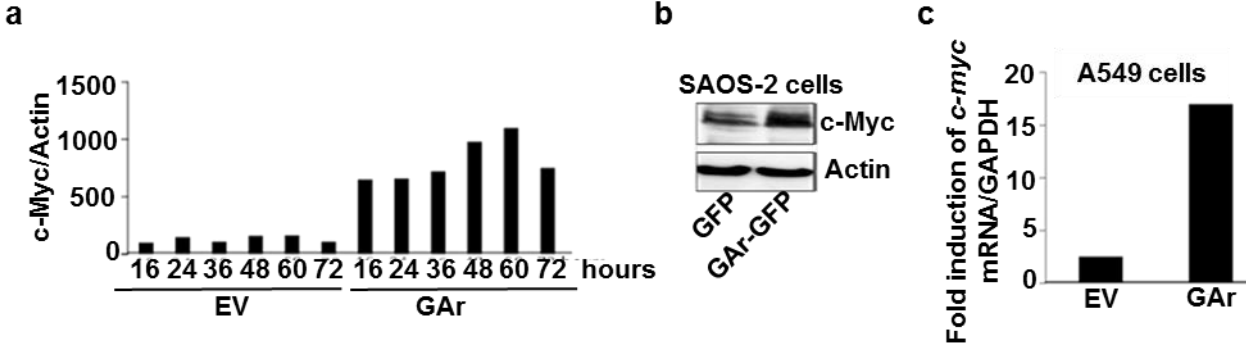

**Supplementary Figure 2.** a) Time course on c-Myc expression levels in SAOS-2 cells expressing GAr compared to control (EV) normalized with actin. b) Induction of c-Myc by the GAr fused to GFP in SAOS-2 cells. c) Induction of *c-myc* mRNA levels by the GAr in A549 cells. Data relates to figure 1.

**Supplementary Figure 3**

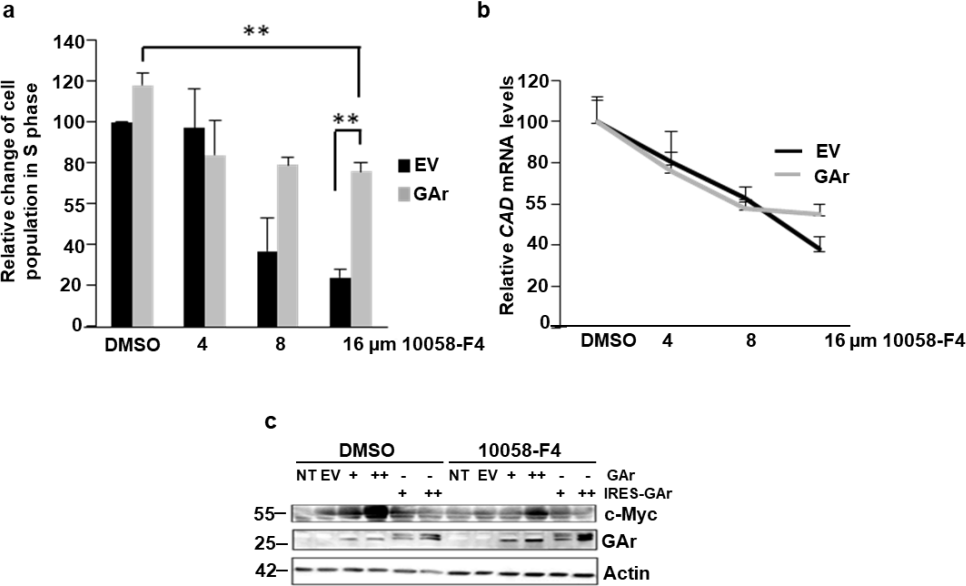

**Supplementary Figure 3.** a). FACS analysis of replicating cells following 48 hours of GAr expression, or control (EV), and treatment with increasing concentrations of the c-Myc inhibitor F4-10058 or DMSO control (16 hours before harvest). The data show relative values of cells in S-phase and the DMSO treated vector control is set to 100 %. b) Like in a), but RT-qPCR data show the relative levels of *CAD* mRNA. c) The presence of the 10058-F4 compound does not affect GAr-mediated induction c-Myc. Representation of mean data from three independent experiments with s.d. ( $p^{**}<0.05$ ). Data relates to figure 1.

### Supplementary Figure 4

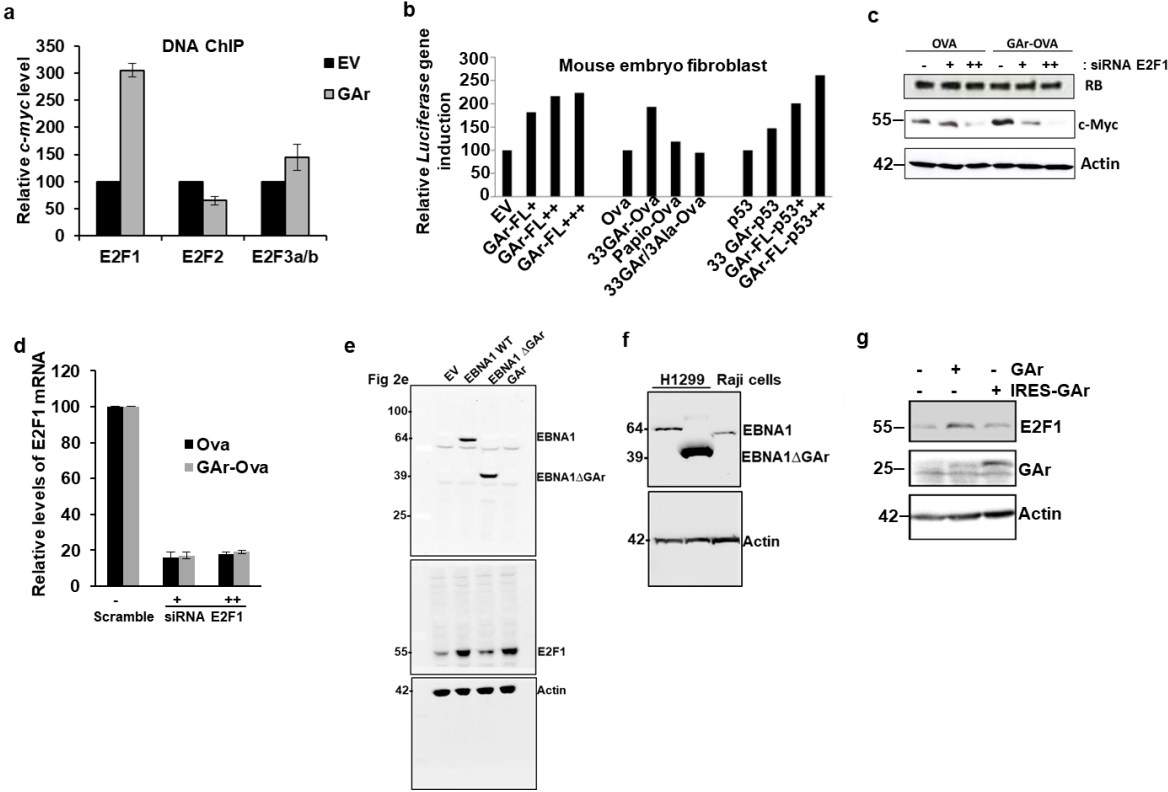

**Supplementary Figure 4.** a) Data from DNA ChIP assays using the (-83/+30) sequence of the endogenous *c-myc* promoter construct and antibodies against E2F1, E2F2 or E2F3a/b from cells expressing the GAr or EV. b) The effect of different GAr-carrying mRNAs on the human *myc*-promoter (-107/+34) fused to *luciferase* reporter gene in MEF cells. The Papio GAr has a serine residue inserted in every 8 codon and does not suppress mRNA translation. 33GAr-ova has a 33 long GAr fused in front of Ovalbumin. The 33GAr/3Ala has a disrupted GAr repeat sequence and is less effective in suppressing mRNA translation<sup>1</sup>. c) Silencing of *E2F1* mRNA affects c-Myc induction both in control (Ova) and GAr (GAr-Ova) transfected cells. d) Relative *E2F1* mRNA levels in Ova and GAr-Ova expressing cells (normalized against actin) treated with scramble siRNA and siRNA targeting E2F1. e) The full blot of main figure 2e as indicated. f) Comparison of EBNA1 protein levels between H1299 cells transfected with EBNA1 WT and EBNA1ΔGAr and Raji cells expressing endogenous EBNA1. g) Preventing the translation inhibitory activity of the GAr by inserting the *c-myc* IRES in the 5' UTR of the GAr-expressing mRNA abrogates induction of E2F1. The values in panels a and d represent the mean data from three independent experiments with s.d. Data relates to figure 2.

**Supplementary Figure 5**

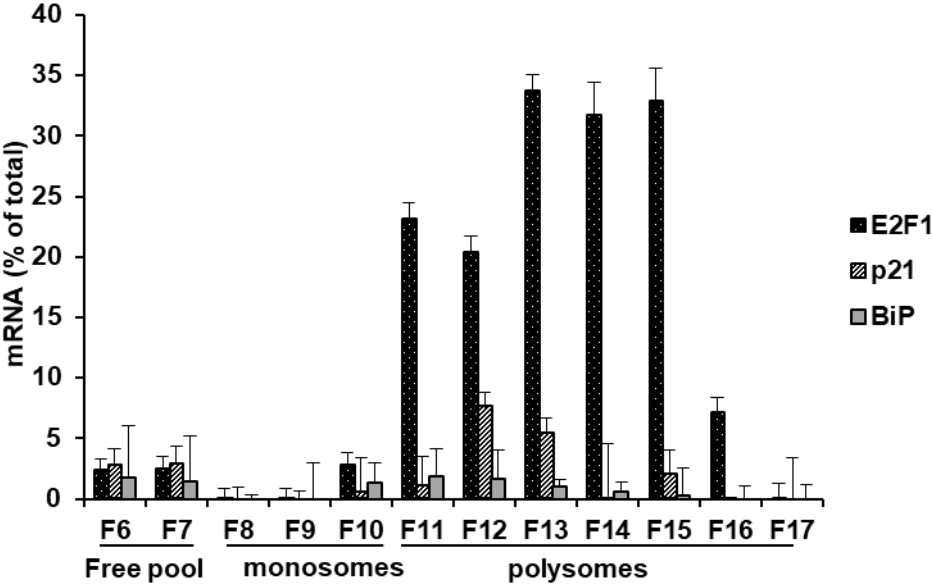

**Supplementary Figure 5.** Polysome profiling and RT-qPCR analysis of *E2F1*, *p21* and *BiP* mRNAs in GAr expressing H1299 cells. The mRNA levels were normalised with actin in all fractions. The % of mRNA in each fraction from total mRNA was plotted. E2F1 mRNA levels show significant increase in polysomal fractions following GAr induction. The values represent the mean data of three independent experiments with s.d. Data relates to Figure 4c.

**Supplementary Figure 6**

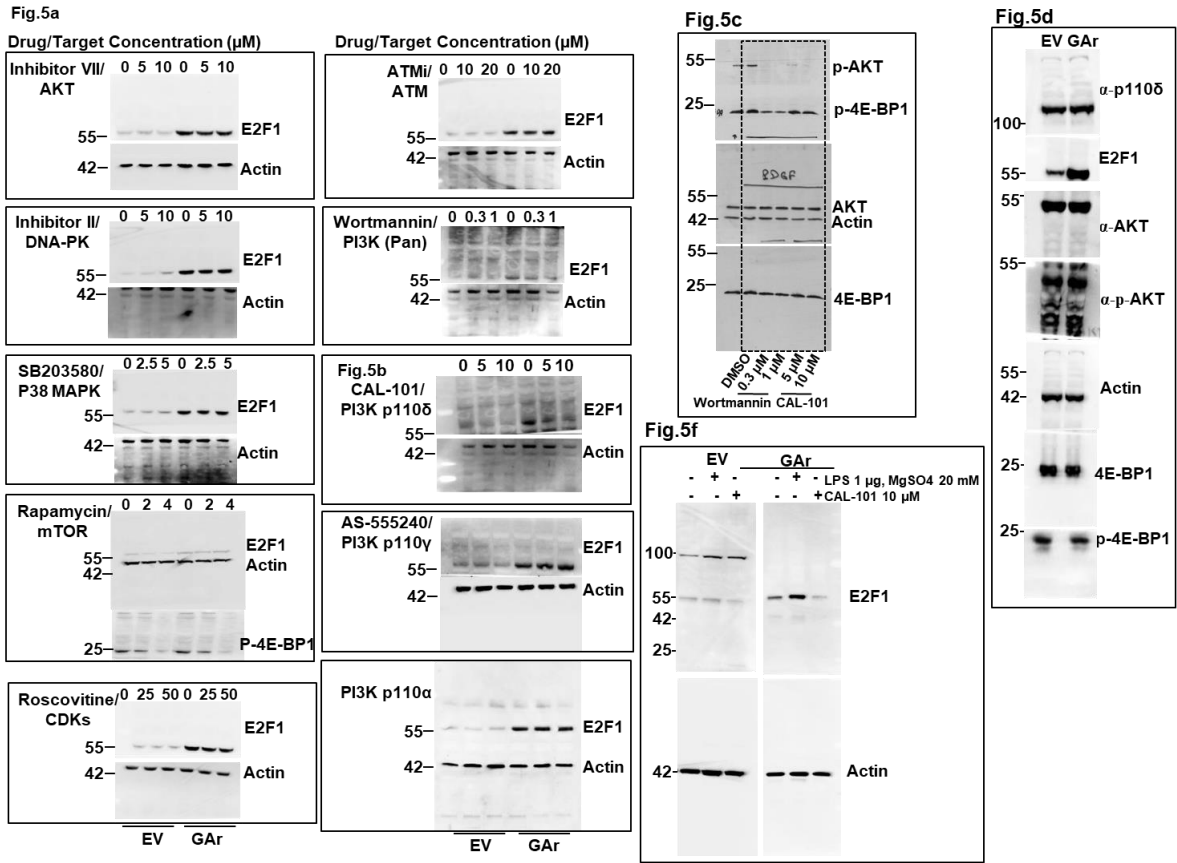

**Supplementary Figure 6.** Uncropped blots of main figures 5a, 5b, 5c, 5d and 5f as indicated.

**Supplementary Figure 7**

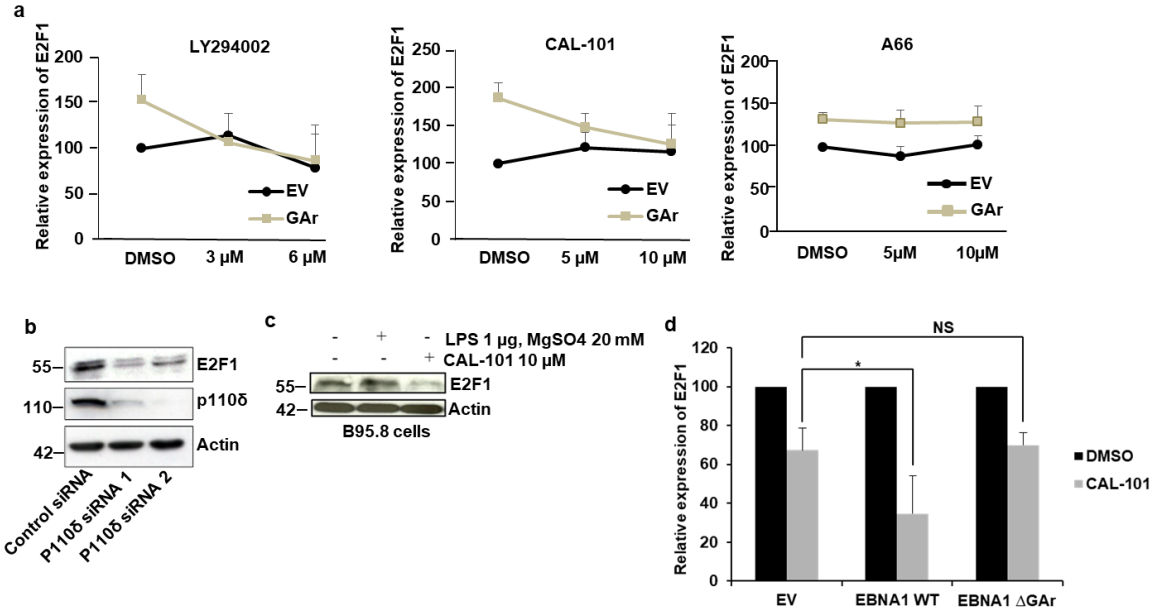

**Supplementary Figure 7.** a) The graphs show the relative mean values on E2F1 expression in H1299 cells treated with indicated drugs. b) Treatment of H1299 cells with two different siRNAs against p110 $\delta$  suppresses the expression of E2F1. c) Western blot showing the expression of E2F1 proteins in EBV transformed B-lymphoblastoid cell line (B95.8) following induction of PI3K $\delta$  with MgSO4 (20 mM), LPS (1 $\mu$ g) and functional inactivation of PI3K $\delta$  by treating with CAL-101. d) The graph shows CAL-101 (10  $\mu$ M)-mediated suppression of E2F1 expression in H1299 cells expressing vector control (EV), EBNA1 WT or EBNA1  $\Delta$ GAr. The data shows that the relative suppression of E2F1 expression by CAL-101 is similar in control and EBNA1  $\Delta$ GAr-expressing cells and that the strongest effect is observed in cells expressing EBNA1 WT. The values represent the mean data from three independent experiments with s.d. Statistical significance was calculated using *t*-tests ( $p^* < 0.1$  and NS- not significant). Data related to Figures 5 and 6.

Supplementary Figure 8

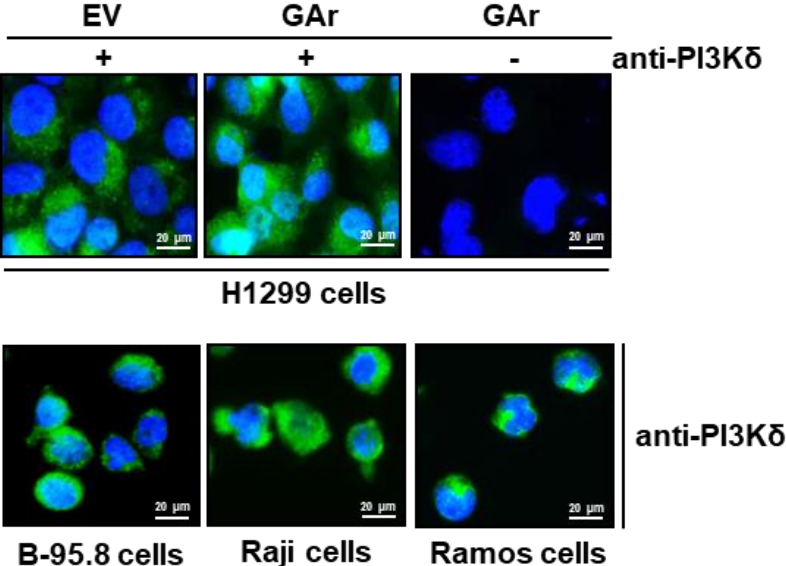

**Supplementary Figure 8.** Assessment of PI3Kδ localization upon GAr expression. Immunofluorescence staining was performed with PI3Kδ mouse monoclonal antibody (sc-136032) and goat anti-mouse antibody (Alexa flour 488, ab150113) and DAPI. The upper panel shows localization of PI3Kδ in H1299 cells expressing EV and GAr, cells expressing GAr probed without PI3Kδ antibody used as a negative control. The lower panel shows the localization of PI3Kδ in the EBV positive B95.8, Raji and the EBV negative Ramos cells. Data relates to figure 5.



**Supplementary Figure 9**

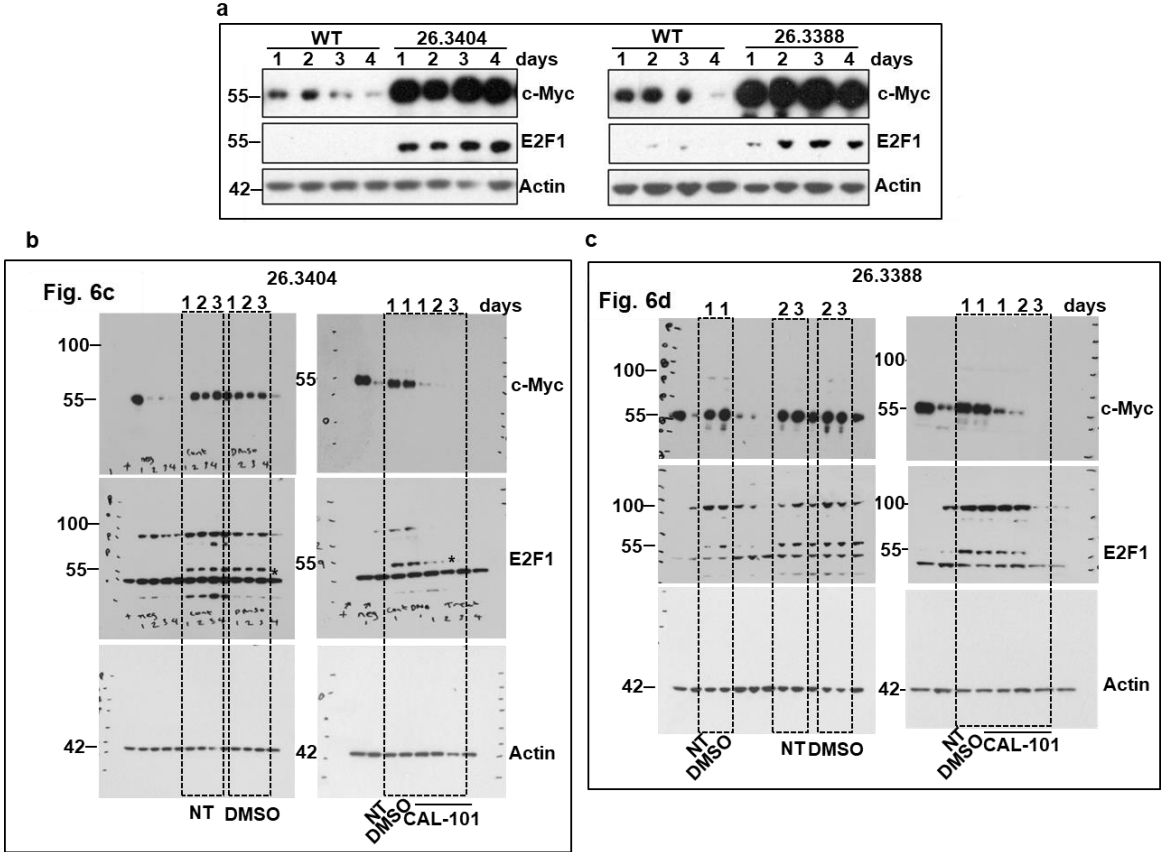

**Supplementary Figure 9.** a) Western blots showing a time course of the expression of E2F1 and c-Myc in non-transgenic wild type (WT) lymphocytes and in EBNA1 transgenic cells from two different primary tumours (ID:26.3404 and 26.3388) both were cultured for 4 days without any treatment, actin was used as a loading control. b) and c) Uncropped blots of main figures 6c and 6d respectively as indicated.

## Supplementary Table. 1

### Primers list.

| Primer            | Sequence 5'-3'                        | description                                           |
|-------------------|---------------------------------------|-------------------------------------------------------|
| Oligo             | Sequence 5'-3'                        | description                                           |
| E2F1 CDS_f        | GTGAGCGTCATGGCCTTG                    | forward primer for generating E2F1 CDS                |
| E2F1 CDS_r        | TCAGAAATCCAGGGGGGTGAGGTC              | reverse primer for generating E2F1 CDS                |
| E2F1_T1_f_HindIII | TATAAGCTTATGGACCTGCTCTTCGCCACACCGCA   | forward primer for generating E2F1 Δ(+1 to + 249)     |
| E2F1_T2_f_HindIII | TATAAGCTTATGCCGGGCGAGAGCCGCCATCCAGGAA | forward primer for generating E2F1 Δ(+1 to + 324)     |
| E2F1_T3_f_HindIII | TATAAGCTTATGCTGAAGCTGGGCTGCCGAGGT     | forward primer for generating E2F1 Δ(+1 to + 432)     |
| E2F1_T4_f_HindIII | TATAAGCTTATGGAGGGCATCCAGCTCATTGCCA    | forward primer for generating E2F1 Δ(+1 to + 525)     |
| E2F1_T5_f_HindIII | TATAAGCTTATGACCACAGTGGGCGTCGGCGGA     | forward primer for generating E2F1 Δ(+1 to + 585)     |
| E2F1_r_XhoI       | TATCTCGAGTCAGAAATCCAGGGGGGTGAGGT      | reverse primer for generating deletion clones of E2F1 |
| E2F1_f_RT-qPCR    | ACTCCTCGCAGATCGTCATCATCT              | forward primer for E2F1 RT-qPCR                       |
| E2F1_r_RT-qPCR    | GGACGTTGGTGGATGTCATAGATGCG            | reverse primer for E2F1 RT-qPCR                       |
| c-Myc (-83/+30)_f | AGGGCTTCTCAGAGGCTTG                   | forward primer for DNA-Chip assay                     |
| c-Myc (-83/+30)_r | TGCCTCTCGTGGAAATTA                    | reverse primer for DNA-Chip assay                     |
| β-actin_qPCR_f    | TCACCCACACTGTGCCCATCTACGA             | forward primer for Actin RT-qPCR                      |
| βactin_qPCR_r     | TGAGGTAGTCAGTCAGGTC                   | reverse primer for Actin RT-qPCR                      |
| c-Myc-F           | AACCAAGATTTCACTCGGACCCG               | forward primer for c-Myc RT-qPCR                      |
| c-Myc-R           | TTGTGCTGATGTGTGGAGCGTGG               | reverse primer for c-Myc RT-qPCR                      |
| CAD-F             | TGGGTGTGGACCTAGTAGCC                  | forward primer for CAD RT-qPCR                        |
| CAD-R             | TGGGGATCTTAAAGCCAGTG                  | reverse primer for CAD RT-qPCR                        |
| cyclinE-F         | GTTATAAGGGAGACGGGGAG                  | forward primer for CyclinE RT-qPCR                    |
| cyclinE-R         | TGCTCTGCTTCTTACCGCTC                  | reverse primer for CyclinE RT-qPCR                    |
| cyclinB-F         | TCTGGATAATGGTGAATGGACA                | forward primer for Cyclin B RT-qPCR                   |
| cyclinB-R         | CGATGTGGCATACTTGTCTTGG                | reverse primer for Cyclin B RT-qPCR                   |
| GAPDH-F           | GAGTCAACGGATTTGGTCTG                  | forward primer for GAPDH RT-qPCR                      |
| GAPDH-R           | GACAAGCTTCCCGTTCTCAG                  | reverse primer for GAPDH RT-qPCR                      |
| Cyclin d1-F       | TACTACCGCCTCACACGCTTC                 | forward primer for Cyclin d1 RT-qPCR                  |
| Cyclin d1-R       | TTCGATCTGCTCTGGCAG                    | reverse primer for Cyclin d1 RT-qPCR                  |
| CDK4-F            | ATGTTGTCCGGCTGATGGA                   | forward primer for CDK4 RT-qPCR                       |
| CDK4-R            | CACCAGGGTTACCTTGATCTCC                | reverse primer for CDK4 RT-qPCR                       |
| RPL38-F           | CGAAAGGATGCCAAATCTGTC                 | forward primer for RPL38 RT-qPCR                      |
| RPL38-R           | TGCCTTCTCTTGTGTCAGTGATG               | reverse primer for RPL38 RT-qPCR                      |
| Rps 19-F          | CAGCACGGCACCCTGTTACC                  | forward primer for Rps 19 RT-qPCR                     |
| Rps 19-R          | GCTGGTCTGACACCCTGTTTC                 | reverse primer for Rps 19 RT-qPCR                     |
| 45S pre-rRNA-F    | GCTGACACGCTGTCTCTG                    | forward primer for 45S pre-rRNA-qPCR                  |
| 45S pre-rRNA-R    | ACGCCGAGAGAAACAGCAG                   | reverse primer for 45S pre-rRNA-qPCR                  |
| p21-F             | CCTCAAATCGTCCAGCGACCTT                | forward primer for p21-qPCR                           |
| p21-R             | CATTGTGGGAGGAGCTGTGAAA                | reverse primer for p21-qPCR                           |
| Bip-F             | GCAACCAAAGACGCTGGA                    | forward primer for Bip-qPCR                           |
| Bip-R             | CCTCCCTCTATCCAGGCCATA                 | reverse primer for Bip-qPCR                           |

### Supplementary Reference

1. Apcher, S. *et al.* mRNA translation regulation by the Gly-Ala repeat of Epstein-Barr virus nuclear antigen 1. *Journal of virology* **83**, 1289-1298 (2009).
